1 **Accuracy of mutual predictions of plant and microbe communities varies along a**  
2 **successional gradient in an alpine glacier forefield**

3 **Authors:** Xie He<sup>1</sup>, Maximilian Hanusch<sup>1</sup>, Victoria Ruiz-Hernández<sup>1</sup>, Robert R.  
4 Junker<sup>1,2\*</sup>

5 <sup>1</sup>Department of Biosciences, University Salzburg, 5020 Salzburg, Austria

6 <sup>2</sup>Evolutionary Ecology of Plants, Department of Biology, Philipps-University Marburg,  
7 35043 Marburg, Germany

8 \*Corresponding author: telephone: +49 6421 28-22434, email: robert.junker@uni-  
9 marburg.de

10 **Summary**

- 11 • Due to climate warming, recently deglaciated glacier forefields create virtually  
12 uninhabited substrates waiting for initial colonization of bacteria, fungi and plants  
13 and serve as an ideal ecosystem for studying transformations in community  
14 composition and diversity over time and the interactions between taxonomic  
15 groups.
- 16 • In this study, we investigated the composition and diversity of bacteria, and fungi,  
17 plants and environmental factors (pH, temperature, plot age and soil nutrients)  
18 along a 1.5km glacier forefield. We used random forest analysis to detect how well  
19 the composition and diversity of taxonomic groups and environmental factors can  
20 be mutually predicted.
- 21 • Community composition and diversity of taxonomic groups predicted each other  
22 more accurately than environmental factors predicted the taxonomic groups; within  
23 the taxonomic groups bacteria and fungi predicted each other best and the taxa's  
24 composition was better predicted than diversity indices. Additionally, accuracy of  
25 prediction among taxonomic groups and environmental factors considerably varied  
26 along the successional gradient.
- 27 • Although our results are no direct indication of interactions between the taxa

28 investigated and the environmental conditions, the accurate predictions among  
29 bacteria, fungi, and plants do provide insights into the concerted community  
30 assembly of different taxa in response to changing environments along a  
31 successional gradient.

32 **Key words:** bacteria, environment, fungi, plants, predictive models, succession.

### 33 **Introduction**

34 Ecological successions represent a sequence of assembly processes leading to diverse  
35 and complex communities. It is widely acknowledged that in primary successions  
36 stochastic events dominate the initial community assembly whereas niche-based  
37 processes become more important in further developed communities where both the  
38 environment and species interactions shape species composition and diversity (Chang  
39 & HilleRisLambers, 2016; Wojcik *et al.*, 2021). Climate warming is initiating primary  
40 successions in glacier forefields as it is speeding up glacier retreat and providing newly  
41 uninhabited substrates for the colonization of organisms forming communities along  
42 the chronosequence. Local microclimatic conditions and soil properties, and the tight  
43 interactions between plant and belowground microbes are part of the environmental and  
44 biotic factors shaping these communities (Zak *et al.*, 2003; Mouhamadou *et al.*, 2013;  
45 Darcy *et al.*, 2018; Navratilova *et al.*, 2019; Harrison *et al.*, 2020; Ohler *et al.*, 2020;  
46 Davison *et al.*, 2021). The relative contributions of environmental and biotic factors on  
47 communities may vary spatially and temporally and may affect different properties of  
48 communities (Mitchell *et al.*, 2011; Chen *et al.*, 2017). In the case of microbial  
49 communities the relative importance of these factors partly depends on the soil  
50 compartment: Microbes colonizing the rhizosphere are directly affected by the sugars,  
51 organic acids and amino acids provided by root exudates, whereas microbes colonizing  
52 bulk soil are less affected by specific plant individuals and may thus respond more  
53 strongly to the environmental conditions (Hartley *et al.*, 2007; Lange *et al.*, 2015;  
54 Sanchez-Canizares *et al.*, 2017). Accordingly, both environmental factors such as soil  
55 chemical properties and temperature (Cheng *et al.*, 2020; Hermans *et al.*, 2020; Davison

56 *et al.*, 2021) as well as plant community composition (Chen *et al.*, 2017; Kruger *et al.*,  
57 2017; Reese *et al.*, 2018) were reported to explain variation in soil microbial  
58 communities. Likewise, microbes and the environment have been shown to affect plant  
59 species composition (Bever *et al.*, 2012; Miller *et al.*, 2020). For instance, recent studies  
60 demonstrated that bacterial and fungal communities in soil may either positively or  
61 negatively affect plant species and communities, and that these effects are tightly  
62 related to the plant functional type or the partnership between the plants and microbial  
63 organisms (Teste *et al.*, 2017; Hahl *et al.*, 2020; Heinen *et al.*, 2020). Within soil  
64 microbial communities, the various interactions between bacteria and fungi are  
65 additionally contributing to community assembly. The interactions between microbes  
66 that share a habitat can either be positive (mutualism, synergism, or commensalism),  
67 negative (pathogenic, predation, parasitism, antagonism, or competition) or neutral (no  
68 observed effects) (Vandenkoornhuysen *et al.*, 2007; Berg *et al.*, 2020). In diverse  
69 communities all of these outcomes of pairwise interactions may occur simultaneously,  
70 which lead to changes of the organism performance and ecosystem productivity (Wargo  
71 & Hogan, 2006; Miransari, 2011). The outcome of pairwise interactions between plant,  
72 bacterial, and fungal species is highly context dependent and thus modulated by the  
73 presence of other species as well as environmental conditions. For instance,  
74 environmental conditions like temperature and soil moisture affect plant and microbes  
75 and can regulate plant-microbe associations (Rasmussen *et al.*, 2019; Rudgers *et al.*,  
76 2020; Robroek *et al.*, 2021), and increasing environmental stress alters microbial  
77 facilitation of plant germination or biomass production (David *et al.*, 2020).

78 Successional gradients such as glacier forefields with considerable variation in soil  
79 properties and climate conditions are an ideal study system to reveal how the  
80 interdependences between taxonomic groups change with environmental conditions.  
81 Previous studies have shown different interactive patterns of organisms in different  
82 successional stages. For instance, a positive relationship between plant and microbial  
83 richness was found in the early succession while not in the late succession (Porazinska  
84 *et al.*, 2018), which may be owing to the fact that pioneering plants serve as nutrition

85 hotspot for microbes in the rhizosphere at the initial sites (Schulz *et al.*, 2013) while in  
86 the late succession the accumulated organic matter provide plenty resources and thus  
87 the mutual predictability between plants and microbes is reduced (Porazinska *et al.*,  
88 2018). Nonetheless, the interdependencies between the organisms that form complex  
89 communities as well as environmental conditions may also leave a signal in community  
90 composition and diversity of plants and microbes and thus these properties may be  
91 mutually predictable (Horn *et al.*, 2017; Leff *et al.*, 2018).

92 Machine learning algorithms have been increasingly applied for pattern recognition and  
93 predictions using complex ecological data. For instance, random forest analysis was  
94 used to explore the links between soil bacterial community composition and  
95 environmental factors such as land use management and soil properties and lead to  
96 predictive models with high accuracy (Hermans *et al.*, 2020). Furthermore, machine  
97 learning models were shown to outperform regression models in trait-matching  
98 predictions for understanding interaction networks (Pichler *et al.*, 2019). The high  
99 performance of machine learning algorithms and especially random forest is obtained  
100 by their ability to model non-linear combinations of numerical and categorical data  
101 without complex transformations resulting in estimates of the accuracy of predictions  
102 as well as the importance of individual variables in improving predictions (Breiman,  
103 2001; Ghannam & Techtmann, 2021). Thus, random forest is an excellent tool for  
104 evaluating the interdependences between various taxonomic groups and environmental  
105 factors (Ghannam & Techtmann, 2021; Goodswen *et al.*, 2021).

106 In recent studies, individual plant variables such as species composition, functional  
107 identity, taxonomic, phylogenetic and functional diversity have been used to predict  
108 microbial communities (Prober *et al.*, 2015; Dassen *et al.*, 2017; Chen *et al.*, 2018; Leff  
109 *et al.*, 2018; Porazinska *et al.*, 2018). In the present study, we consider all the possible  
110 variables and evaluate how well the diversity and composition of plants, bacteria, fungi,  
111 and environmental factors can predict each other in order to explore the  
112 interdependences between the taxonomic groups and environmental factors as well as  
113 their changes along a successional gradient in the forefield of the Ödenwinkelkees

114 glacier in the Austrian Alps (Junker *et al.*, 2020). Here the assembly of multidiverse  
115 communities along the glacier forefield chronosequence provides an excellent  
116 opportunity to track transformations in community composition and diversity over time.  
117 Using random forest analysis, we used plant, bacteria, fungi composition and  
118 environmental factors as explanatory variables and bacteria, fungi and plant species  
119 composition, plant functional composition, plants phylogenetic, functional diversities  
120 and environmental factors as dependent variables to test for interdependencies between  
121 these variables. We aim to address the following two questions: 1) How accurately can  
122 we predict properties of plant and microbial communities with the composition of the  
123 other taxonomic groups as well as environmental factors? 2) Is the accuracy of  
124 prediction variable along the successional gradient? Although our approach does not  
125 directly indicate interactions and dependencies between taxonomic groups and  
126 environmental conditions, it tests the hypothesis that taxonomic groups respond to  
127 changing environmental conditions in a concerted way potentially facilitated by tight  
128 interaction networks.

## 129 **Materials and methods**

### 130 **Data collection**

131 Our study site was located at the forefield of the Ödenwinkelkees glacier (Stubachtal  
132 valley, Hohe Tauern National Park, Austria; Dynamic Ecological Information  
133 Management System – site and dataset registry: [https://deims.org/activity/fefd07db-  
134 2f16-46eb-8883-f10fbc9d13a3](https://deims.org/activity/fefd07db-2f16-46eb-8883-f10fbc9d13a3), last access: August 2021) (Junker *et al.*, 2020). In  
135 summer 2019 (26 June - 16 September), we established 135 permanent plots within the  
136 successional gradient of the glacier forefield. We identified all vascular plant species  
137 occurring at the plots ( $n = 107$ ) and recorded the coverage of plants with a resolution  
138 of 0.1%. We measured the plant height, leaf area, leaf weight and calculated the specific  
139 leaf area (SLA) for those 48 plant species that occurred in 10 or more plots. For three  
140 focus species we phenotyped up to three individuals on every plot where they occurred:  
141 *Oxyria digyna* as representative of early succession, *Trifolium badium* as representative

142 of late succession, and *Campanula scheuchzeri* which occurred all along the  
143 successional gradient (for detailed information on the selection of the focus plant  
144 species see Junker et. al 2020). For the other  $n = 45$  species, up to five individuals per  
145 plot were phenotyped on the youngest, the oldest, and the intermediate plot where they  
146 occurred (for detailed methods see Junker et al 2020). Additionally, we obtained the  
147 functional traits of the plant species from Bioflor database  
148 (<https://www.ufz.de/biolflor/index.jsp>) for 92 species out of 107 plant species occurring  
149 in the field. We used nine functional traits which have been shown to be response traits  
150 to environmental changes at the community level (Kahmen & Poschlod, 2004;  
151 Bernhardt-Römermann *et al.*, 2008; Aguiar *et al.*, 2013; Hintze *et al.*, 2013), including  
152 fruit type, leaf anatomy, leaf persistence, life form, life span, pollen vector, strategy  
153 type, type of reproduction. We also characterized the soil microbiome (bacteria and  
154 fungi) of each of the plots. We sampled soil from each plot at two locations at a depth  
155 of 3cm, soil from two locations per plot were pooled to one sample for further analysis.  
156 Samples were directly transferred to ZR BashingBeads Lysis tubes containing 750  $\mu$ L  
157 of ZymoBIOMICS lysis solution (Zymo-BIOMICS DNA Miniprep Kit; Zymo  
158 Research, Irvine, California, USA). Within 8h after collection of microbial samples, ZR  
159 BashingBeads Lysis tubes were sonicated for 7 min to detach microorganisms from the  
160 surfaces. Subsequently, all microbial samples were shaken using a ball mill for 9  
161 minutes with a frequency of  $30.0 \text{ s}^{-1}$ . Microbial DNA was extracted using the  
162 ZymoBIOMICS DNA Miniprep Kit following the manufacturer's instructions.  
163 Microbiome analysis was performed by Eurofins Genomics (Ebersberg, Germany)  
164 using the company's standard procedure. To assign taxonomic information to each OTU,  
165 DC-MEGABLAST alignments of cluster representative sequences to the sequence  
166 database were performed (Reference database: NCBI\_nt (Release 2018-07-07)).  
167 Further processing of OTUs and taxonomic assignments was performed using the  
168 QIIME software package (version 1.9.1, <http://qiime.org/>) (Caporaso *et al.*, 2010).  
169 Abundances of bacterial and fungal taxonomic units were normalized using lineage-  
170 specific copy numbers of the relevant marker genes to improve estimates (Angly *et al.*,

171 2014). Prior to the statistical analysis of microbial communities, we performed a  
172 cumulative sum scaling (CSS) normalization (R package metagenomeSeq v1.28.2) on  
173 the count data to account for differences in sequencing depth among samples.

174 To record the seasonal mean temperature, we buried temperature loggers with a  
175 resolution of 0.5 °C (MF1921G iButton, Fuchs Elektronik, Weinheim, Germany) 10 cm  
176 north of each plot center, at a depth of 3 cm below ground (Junker *et al.*, 2020; Ohler  
177 *et al.*, 2020) during field work in 2019. The thermo loggers were set to start on 13th  
178 August 2019 and were stopped on 9th August 2020 with a total of 2048 measurements  
179 recorded on 362 days. Seasonal mean temperature was calculated on the basis of the  
180 recordings ranging from 13th August to 16th of September 2019 and 26th June to 9th  
181 August 2020 representing the period in which the plots were free of permanent snow  
182 cover before and after the winter 2019/2020. In 2020 (25 July - 21 August), we took  
183 additional soil samples from all plots to measure soil nutrient content (N P, K, Mg) as  
184 well as soil pH. Samples were sent to AGROLAB Agrar und Umwelt GmbH (Sarstedt,  
185 Germany) for analysis.

## 186 **Data analysis**

187 To test the predictability of the diversity and composition of each of the taxonomic  
188 group by the composition of other taxonomic groups as well as by environmental  
189 parameters, we used the machine learning algorithm random forest (R package  
190 randomForest). Random forest combines several randomized decision trees and  
191 aggregates their predictions by averaging, it can handle multiple input variables  
192 (explanatory variables), which are ranked by different levels of importance in  
193 predicting the dependent variable (Breiman, 2001; Biau & Scornet, 2016). As  
194 explanatory variables we used the community tables of plants, bacteria, and fungi with  
195 plots as rows and the abundance of the species or OTUs as columns (Table S1, S2 &  
196 S3); meanwhile we used multivariate datasets informing about the environmental  
197 conditions of each plot with plots as rows and environmental variables as columns  
198 (Table S4). As dependent variables we used univariate variable including plant Shannon,  
199 phylogenetic and functional diversity, bacteria Shannon diversity, fungi Shannon

200 diversity, soil seasonal mean temperature, pH, plot age, soil N, P, K, and Mg as well as  
201 principal components of the composition of all the taxonomic groups, resulting in 20  
202 variables in total (Table S5). As random forest analysis can only deal with univariate  
203 dependent variables, we used the first two principal component axis (PCA) which carry  
204 most information of the composition to refer to plant species composition (15.3% +  
205 11.2%), bacteria composition (6.4% + 4.6%) and fungi composition (4.1% + 3.2%).  
206 Plant functional composition matrix was generated based on the plant species  
207 composition table and the functional traits table obtained from Bioflor database. For  
208 each category of each trait, we calculated the total coverage of species belonging to the  
209 category, and this was done for all the 9 traits and all 9 traits were merged to a single  
210 table, thus generating the functional composition table with plots name as rows and 50  
211 trait categories as columns, i.e. each categorial traits had two or more categories  
212 resulting in a total of 50 categories. (Table S6). Plant functional composition was  
213 represented by the first two PCAs, too (59.3% + 12.3%). Plant Shannon diversity was  
214 calculated from the compositional dataset using the R package vegan (Dixon, 2003).  
215 Plant phylogenetic diversity was calculated using the R package picante (Kembel *et al.*,  
216 2010). We extracted a phylogenetic tree using the R package pez (Pearse *et al.*, 2015)  
217 for species existing in our field site from a dated molecular phylogeny tree (32,223  
218 species) for land plants (Zanne *et al.*, 2014). In cases where species were not included  
219 in the tree, it was substituted by species from the same genus. Among 107 species  
220 existing in our plots, we were able to match and built a tree with 104 species and we  
221 used it for the calculation of phylogenetic diversity. We used 'Functional dispersion'  
222 calculated from the R package FD (Laliberte & Legendre, 2010) as the index for plant  
223 functional diversity. The mean plant height, leaf area, leaf weight and SLA of every  
224 species were used for the trait table (Table S7) identically for every plot, and for the  
225 community table the species with a low occurring frequency along the successional  
226 gradient (not included in the 48 species with traits measured) were ignored in the  
227 calculation of functional diversity. For bacteria and fungi, the Shannon diversity was  
228 calculated based on the OTU composition after rarefying the data to the minimum



229 number of reads available in the samples (repeats = 999).

230 Using all combinations of explanatory and dependent variables, we performed random  
231 forest analyses with 10-fold cross validations to quantify the performance of the  
232 predictive model. Specifically, for each prediction, 80% of the plots were randomly  
233 selected as the training dataset and the remaining 20% of the plots were used as test  
234 dataset. The predictive model resulting from the training dataset was applied to the test  
235 data and the predicted values of the plots in the test dataset were correlated with the  
236 observed values of these plots. This process was repeated for ten times, and then we  
237 defined the mean Pearson's  $r$ -value of ten correlations as 'accuracy of prediction' and  
238 used the proportion of significant correlations ( $p$ -value  $< 0.05$ ) out of the 10 correlations  
239 as 'significance frequency'. Additional to random forest analysis using all the plots for  
240 a global impression on the predictability of dependent variables, we also employed a  
241 moving frame approach to detect how the predictabilities change along the successional  
242 gradient. With the 135 plots, we grouped every 45 plots into one frame and used the  
243 median plot as identifier of the frame. Thus, the first frame included plots 1 to 45, the  
244 second 2 to 46, and so forth. This approach led to a set of 91 moving frames whose  
245 identifiers ranged from plot 23 to plot 113. Using the same proportion of training and  
246 test dataset, for every 45 plots in each frame, data of 36 (80%) randomly selected plots  
247 was used as training dataset, and the other 9 (20%) plots were used as test dataset. The  
248 accuracy of prediction and significance frequency were calculated for every frame as  
249 stated before. We fitted a linear or quadratic regression with the accuracy of prediction  
250 of every variable along the successional gradient as independent variable and the frame  
251 number as explanatory variable. The model with a higher  $r^2$  value was chosen and the  
252 statistically significant relationships were shown as a regression line.

253 To make a comprehensive comparison of how well every variable is predicted by the  
254 other individual group and by the other three groups combined, we did the same random  
255 forest predicting procedure for each of the 20 variables using the other three groups  
256 together (except for the group that was considered in the dependent variable). We  
257 compared for each variable how well they were predicted by every other single group

258 and by three groups combined using the Tukey Test.

## 259 **Results**

260 In total we obtained soil bacteria and fungi composition data from  $n = 127$  and 130  
261 plots, respectively;  $n = 5221$  bacteria OTUs and  $n = 6016$  fungi OTUs were detected in  
262 all the soil samples. Raw sequences of next-generation 16S rRNA gene amplicon  
263 sequencing are available at the NCBI Sequence Read Archive (SRA) under the  
264 BioProject accession PRJNA701884 and PRJNA701890. The mean accuracy of  
265 prediction of each pair of explanatory variables and dependent variables did usually not  
266 strongly differ between the global analysis considering all plots and the mean of the  
267 frame-wise analyses, indicating the validity of using the moving frames for random  
268 forest predictions. Most of the predictions fit a quadratic regression, indicating a non-  
269 monotonic change of the accuracy of prediction along the successional gradient.

270 *Bacterial communities as predictors (Fig. 1 and Fig. 5a)* – Bacterial communities  
271 (quantitative OTU tables) most accurately predicted the taxonomic composition of  
272 fungal communities (PC1 and PC2) followed by plant functional composition. Among  
273 the environmental parameters, plot age and pH-value were most accurately predicted  
274 by bacterial communities. Note that our results do not imply a direction of effects in the  
275 sense that the dependent variable is affected by the explanatory variable. For instance,  
276 bacterial communities do not affect the soil temperature but are affected by this  
277 environmental parameter. Accuracy of prediction of target variables associated with  
278 plant communities mostly decreased with plot age, whereas accuracy of prediction of  
279 fungi and environmental target variables remained constant or even increased along the  
280 age gradient in most cases.

281 *Fungi communities as predictors (Fig. 2 and Fig. 5b)*– Fungal communities  
282 (quantitative OTU tables) most accurately predicted the taxonomic composition of  
283 bacterial communities (PC1 and PC2) and bacterial Shannon diversity was the variable  
284 with the lowest accuracy of prediction. Plot age and pH were also the environmental  
285 factors that were most accurately predicted by fungi communities. Similar to bacterial

286 predictions, accuracy of prediction of target variables associated with plant  
287 communities mostly decreased with plot age, whereas accuracy of prediction of  
288 bacterial and environmental target variables remained constant or increased along the  
289 age gradient in most cases.

290 *Plant communities as predictors (Fig. 3 and Fig. 5c)*– Plant communities (quantitative  
291 vegetation table) predicted the plot age most accurately, followed by fungi composition  
292 (PC1) and bacteria composition (PC1). Plant communities predicted bacteria and fungi  
293 Shannon diversities least accurately. The plant predictions of variables concerning  
294 bacteria, fungi and some environmental parameters were mostly decreasing with  
295 increasing plot age. For environmental variables, the accuracy of prediction for  
296 temperature, pH and soil Mg increased and the others were mostly decreasing with plot  
297 age.

298 *Environmental factors as predictors (Fig. 4 and Fig. 5d)*– Environmental factors  
299 (multivariate table of environmental parameters) predicted the fungi composition PC1  
300 and bacteria composition PC1 with the highest accuracy, followed by plant functional  
301 diversity and plant species composition PC2. Accuracy of prediction for plant variables  
302 were mostly decreasing along the gradient, and for bacteria and fungi they either had  
303 the highest accuracy of prediction in the middle age or increase with plot age.

304 *Combined groups as predictors (Fig. 6)* – Using all taxonomic groups and  
305 environmental variables (except for the group that was considered in the dependent  
306 variable) together to predict dependent variables increased the accuracy of prediction  
307 for plant functional composition PC1, plant functional composition PC2, fungi  
308 composition PC1. For plot age, the accuracy of prediction even decreased, and for other  
309 variables especially environmental variables, the accuracy of prediction with all the  
310 groups combined did not significantly increase.

## 311 **Discussion**

312 Our results indicate that the composition and diversity of plant, bacteria, and fungi is -  
313 to a certain degree - predictable by the composition of the respective other taxonomic

314 groups as well as by environmental factors. The accuracy of prediction, however, varied  
315 along the successional gradient of the forefield of the Ödenwinkelkees glacier. Overall,  
316 the taxonomic groups predicted each other more accurately than environmental factors  
317 predicted the taxonomic groups; within the taxonomic groups their composition was  
318 better predicted than diversity indices. When using a combined dataset as predictors,  
319 only a few variables obtained increased accuracy of prediction compared with using a  
320 single group, and most of the variables have no significant difference or even decreased  
321 accuracy of prediction. Well performing predictive models may indicate direct  
322 interactions between taxa or effects of the environment on taxa. However, statistical  
323 associations between taxa may also suggest that both taxa respond similarly to a third  
324 taxonomic group or an environmental factor (Blanchet *et al.*, 2020). Thus, while our  
325 results do not directly reveal ecological interactions, they do provide insights into the  
326 concerted community assembly of different taxa in response to changing environmental  
327 factors along a successional gradient.

328 Variables describing the composition of taxonomic groups (e.g. PC axis of community  
329 composition) were mostly more precisely predicted by other taxonomic groups than  
330 diversity indices. Particularly, the community composition of bacteria and fungi  
331 mutually predicted each other most precisely, which confirms previous studies  
332 demonstrating the interdependences between bacteria and fungi (Miransari, 2011;  
333 Deveau *et al.*, 2018). Both bacteria and fungi community composition predicted plant  
334 functional composition more precisely than species composition and functional,  
335 phylogenetic and taxonomic diversity of plants. These results indicate that the plant  
336 functional identity has a stronger effect on soil microbial communities than plant  
337 species identity and diversities (Dassen *et al.*, 2017). Fungal composition was better  
338 predicted by plant composition than bacterial composition, which may reflect the tight  
339 interaction between plants and fungi, especially mycorrhiza (Horn *et al.*, 2017;  
340 Sweeney *et al.*, 2021). The interactions between plants and microbes are mediated  
341 through plant root exudates and litter input (Knelman *et al.*, 2012; Lopez-Angulo *et al.*,  
342 2020). Root exudates vary substantially between different plant species and various

343 microbes utilize the carbon source from plants (Vandenkoornhuysen *et al.*, 2007). In this  
344 way, the plant community provides various niches for the microbes and plays an  
345 important role shaping microbial communities in the soil (Bever *et al.*, 2012). Likewise,  
346 the interplay of facilitative and antagonistic effects determines the direction of  
347 feedbacks from soil microbes to plants and maintains the diversity of plant communities  
348 (Bever *et al.*, 2012; Teste *et al.*, 2017; Mony *et al.*, 2021). Nevertheless, although it has  
349 been reported that plant composition has an effect on microbial richness (Lopez-Angulo  
350 *et al.*, 2020), we did not detect a strong accuracy of prediction between plant  
351 composition and bacterial or fungal Shannon diversity. This suggests that interactions  
352 within taxonomic groups are reducing the accuracy of prediction between the  
353 composition and diversity of plants and microbes. For instance, positive or negative  
354 effects of individual bacterial strains on plant growth may be changed by the presence  
355 of other strains (Raza *et al.*, 2020), which may lead to a hardly predictable complexity  
356 of interdependencies and influences.

357 Plot age, soil temperature and soil pH were well predicted by taxonomic groups, and  
358 soil nutrients were less well predicted. In contrast, the environmental variables did not  
359 accurately predict the composition and diversity of the taxa. As stated above, our  
360 approach is not implying a direction of effects, which means that it is more likely that  
361 the environmental factors affect the composition and diversity of the taxonomic groups  
362 and not *vice versa*. Among all the environmental factors, plot age is the environmental  
363 factor best predicted by taxonomic groups, followed by soil temperature and pH. Plants  
364 predicted plot age better than bacteria and fungi, and the signal was even blurred when  
365 using all the groups together. This indicates that plant communities follow a clear  
366 succession with age-specific stages. Microbes may be more responsive to other  
367 environmental factors that may act on short term fluctuations such as temperature,  
368 which is equally well predicted by the compositions of bacteria, fungi and plants  
369 suggesting its common importance in defining the niche of all taxa. Previous studies  
370 demonstrated that plants and microbes from different origins may respond to increased  
371 temperature variously, thus we may infer that climate change will shift the interactive

372 patterns between species (Rasmussen *et al.*, 2019; Rudgers *et al.*, 2020; Losapio *et al.*,  
373 2021). In addition, pH was better predicted by bacteria and fungi than by plants,  
374 indicating that pH is affecting soil microbes more than plants, which is in agreement  
375 with previous studies illustrating the importance of pH in affecting microbial  
376 communities (Knelman *et al.*, 2012; Shen *et al.*, 2020). Soil nutrients such as N, P, K,  
377 Mg were more accurately predicted by plants than by microbes suggesting strong  
378 feedbacks between soil nutrients and plant communities (Fischer *et al.*, 2019). In  
379 summary, we showed that plants, bacteria, and fungi mutually predict each other's  
380 diversity and community composition and that environmental parameters are also well-  
381 suited predictors for the same biotic dependent variables. This is in line with previous  
382 studies demonstrating that plant communities and environmental factors are  
383 contributing and explaining different parts of variation in soil microbial communities  
384 (Mitchell *et al.*, 2011) and that interactions between plants and microbes can be  
385 independent on environmental changes (Sweeney *et al.*, 2021).

386 Accuracy of prediction varied with successional age. For instance, plant taxonomic and  
387 functional composition was better predicted by bacteria and fungi at early than late  
388 succession. This could be explained by a relatively clear signal of interaction between  
389 individual plant species and microbes at early succession while the signal of individual  
390 plant species may be diluted at late successional stages where communities become  
391 complex (Porazinska *et al.*, 2018). The interactions between plants and microbes are  
392 known to be responding to primary successions. For instance, while plant-derived  
393 carbon becomes a major source for bacteria after 50 years of succession, these  
394 communities utilize ancient carbon in the first decades after deglaciation, which has  
395 been demonstrated in the area of our study site (Bardgett *et al.*, 2007). In accordance  
396 with this finding, Tscherko *et al.* (2005) found evidence of plants shaping microbial  
397 communities in soils older than 43 years in another Austria glacier, the Rotmoosferner.  
398 These results suggest a higher accuracy of prediction of microbial communities by  
399 plants at later successional stages, which is not fully in line with our findings. In contrast  
400 to many other statistical methods, random forest decision trees consider individual

401 features instead of multivariate representations of the communities. Thus, even though  
402 bacterial communities are mainly shaped by abiotic factors and non-plant related carbon  
403 sources, random forest is able to select those strains that may be associated with the few  
404 plant species colonizing the young plots, which represents a strong signal in the data.  
405 In contrast in older plots, when plants provide the major carbon source, the signal of  
406 each individual species may be diluted resulting in a poor prediction. Additionally,  
407 further carbon sources accumulate such decomposed soil organic matters, which again  
408 sustains microbial communities unrelated to plant species diversity and composition.  
409 Another reason for our finding may be the reduced variability in plant species  
410 composition and diversity between older plots, which is a common finding in primary  
411 successions (Ortiz-Alvarez *et al.*, 2018). This could also partly explain the decrease of  
412 accuracy of prediction between plants and microbes along the succession as the  
413 decreased variation of community composition makes it less sensitive to detect the  
414 change of the interacting taxa. Finally, age is not the only factor that is affecting the  
415 successional age of plots in glacier forefields, instead allogenic factors may reset  
416 successions or at least slow down successional progress in community development  
417 (Wojcik *et al.* 2021). These allogenic factors, such as geomorphic events, accumulate  
418 over time and thus may lead to outliers in community composition. If these outlier plots  
419 are part of test dataset, they cannot be predicted on models as predictions are only  
420 possible in the range of the training dataset.

421 Our results demonstrate the concerted development of plants and microbial  
422 communities regulated by environmental factors along a successional gradient, which  
423 suggests strong interdependencies between the taxa. As a next step, approaches like the  
424 one described here may be used to identify indicator species and environmental  
425 variables that inform best about the diversity and composition of ecosystems, which  
426 facilitates monitoring and conservation efforts. Additionally, climate warming demands  
427 the prediction of ecosystem-wide responses and our data presents existing patterns and  
428 offers information for future predictions.

## 429 **Acknowledgement**

430 We thank the Hohe Tauern National Park Salzburg Administration and the Rudolfshütte  
431 for organizational and logistic support, the governing authority Land Salzburg for the  
432 permit to conduct our research (permit # 20507-96/45/7-2019). Jan-Christoph Otto,  
433 Tobias Seifert, and Anna Vojtkó for help in the field. Hamed Azarbad, Lisa-Maria Ohler  
434 and Verena Zieschank provided valuable comments to improve the study. The study  
435 was supported by the START-program of the Austrian Science Fund (FWF) granted to  
436 Robert R. Junker (Y1102).

#### 437 **Author contributions**

438 RRJ conceived the study. XH, MH, VRH and RRJ designed the study and collected the  
439 data. XH and RRJ analyzed the data. XH and RRJ wrote the manuscript with critical  
440 input from MH and VRH. All authors contributed to the manuscript and approved the  
441 final version.

#### 442 **References**

- 443 Aguiar FC, Cerdeira JO, Martins MJ, Ferreira MT & Pillar V. 2013. Riparian forests of  
444 Southwest Europe: are functional trait and species composition assemblages  
445 constrained by environment? *Journal of Vegetation Science* **24**: 628-638.
- 446 Angly FE, Dennis PG, Skarshewski A, Vanwonderghem I, Hugenholtz P & Tyson GW.  
447 2014. CopyRighter: a rapid tool for improving the accuracy of microbial  
448 community profiles through lineage-specific gene copy number correction.  
449 *Microbiome* **2**: 11.
- 450 Bardgett RD, Richter A, Bol R, Garnett MH, Baumler R, Xu X, Lopez-Capel E,  
451 Manning DA, Hobbs PJ, Hartley IR et al. 2007. Heterotrophic microbial  
452 communities use ancient carbon following glacial retreat. *Biology Letters* **3**:  
453 487-490.
- 454 Berg G, Rybakova D, Fischer D, Cernava T, Verges MC, Charles T, Chen X, Cocolin  
455 L, Eversole K, Corral GH et al. 2020. Microbiome definition re-visited: old  
456 concepts and new challenges. *Microbiome* **8**: 103.
- 457 Bernhardt-Römermann M, Römermann C, Nuske R, Parth A, Klotz S, Schmidt W &



- 458 Stadler J. 2008. On the identification of the most suitable traits for plant  
459 functional trait analyses. *Oikos* **117**: 1533-1541.
- 460 Bever JD, Platt TG & Morton ER. 2012. Microbial population and community  
461 dynamics on plant roots and their feedbacks on plant communities. *Annual*  
462 *Review of Microbiology* **66**: 265-283.
- 463 Biau G & Scornet E. 2016. A random forest guided tour. *Test* **25**: 197-227.
- 464 Blanchet FG, Cazelles K & Gravel D. 2020. Co-occurrence is not evidence of  
465 ecological interactions. *Ecology Letters* **23**: 1050-1063.
- 466 Breiman L. 2001. Random Forests. *Machine Learning* **45**: 5-32.
- 467 Caporaso JG, Kuczynski J, Stombaugh J, Bittinger K, Bushman FD, Costello EK,  
468 Fierer N, Pena AG, Goodrich JK, Gordon JI et al. 2010. QIIME allows analysis  
469 of high-throughput community sequencing data. *Nature Methods* **7**: 335-336.
- 470 Chang C & HilleRisLambers J. 2016. Integrating succession and community assembly  
471 perspectives. *F1000Research* **5**: 1-10.
- 472 Chen W, Xu R, Wu Y, Chen J, Zhang Y, Hu T, Yuan X, Zhou L, Tan T & Fan J. 2018.  
473 Plant diversity is coupled with beta not alpha diversity of soil fungal  
474 communities following N enrichment in a semi-arid grassland. *Soil Biology and*  
475 *Biochemistry* **116**: 388-398.
- 476 Chen Y-L, Xu T-L, Veresoglou SD, Hu H-W, Hao Z-P, Hu Y-J, Liu L, Deng Y, Rillig  
477 MC & Chen B-D. 2017. Plant diversity represents the prevalent determinant of  
478 soil fungal community structure across temperate grasslands in northern China.  
479 *Soil Biology and Biochemistry* **110**: 12-21.
- 480 Cheng J, Zhao M, Cong J, Qi Q, Xiao Y, Cong W, Deng Y, Zhou J & Zhang Y. 2020.  
481 Soil pH exerts stronger impacts than vegetation type and plant diversity on soil  
482 bacterial community composition in subtropical broad-leaved forests. *Plant and*  
483 *Soil* **450**: 273-286.
- 484 Darcy JL, Schmidt SK, Knelman JE, Cleveland CC, Castle SC & Nemergut DR. 2018.  
485 Phosphorus, not nitrogen, limits plants and microbial primary producers  
486 following glacial retreat. *Science Advances* **4**: eaaq0942.

- 487 Dassen S, Cortois R, Martens H, de Hollander M, Kowalchuk GA, van der Putten WH  
488 & De Deyn GB. 2017. Differential responses of soil bacteria, fungi, archaea and  
489 protists to plant species richness and plant functional group identity. *Molecular*  
490 *Ecology* **26**: 4085-4098.
- 491 David AS, Thapa-Magar KB, Menges ES, Searcy CA & Afkhami ME. 2020. Do plant-  
492 microbe interactions support the Stress Gradient Hypothesis? *Ecology* **101**:  
493 e03081.
- 494 Davison J, Moora M, Semchenko M, Adenan SB, Ahmed T, Akhmetzhanova AA,  
495 Alatalo JM, Al-Quraishy S, Andriyanova E, Anslan S et al. 2021. Temperature  
496 and pH define the realised niche space of arbuscular mycorrhizal fungi. *New*  
497 *Phytologist* **231**: 763-776.
- 498 Deveau A, Bonito G, Uehling J, Paoletti M, Becker M, Bindschedler S, Hacquard S,  
499 Herve V, Labbe J, Lastovetsky OA et al. 2018. Bacterial-fungal interactions:  
500 ecology, mechanisms and challenges. *FEMS Microbiology Reviews* **42**: 335-352.
- 501 Dixon P. 2003. VEGAN, a package of R functions for community ecology. *Journal of*  
502 *Vegetation Science* **14**: 927-930.
- 503 Fischer HS, Michler B, Ziche D & Fischer A. 2019. Plants as Indicators of Soil  
504 Chemical Properties. In: Wellbrock N, Bolte A, eds. *Status and Dynamics of*  
505 *Forests in Germany*. Ecological Studies (Analysis and Synthesis), Springer,  
506 Cham, 295-309.
- 507 Ghannam RB & Techtmann SM. 2021. Machine learning applications in microbial  
508 ecology, human microbiome studies, and environmental monitoring.  
509 *Computational and Structural Biotechnology Journal* **19**: 1092-1107.
- 510 Goodswen SJ, Barratt JLN, Kennedy PJ, Kaufer A, Calarco L & Ellis JT. 2021. Machine  
511 learning and applications in microbiology. *FEMS Microbiology Reviews*. doi:  
512 10.1093/femsre/fuab015
- 513 Hahl T, Moorsel SJ, Schmid MW, Zuppinger-Dingley D, Schmid B, Wagg C & Thakur  
514 M. 2020. Plant responses to diversity-driven selection and associated  
515 rhizosphere microbial communities. *Functional Ecology* **34**: 707-722.

- 516 Harrison S, Spasojevic MJ & Li D. 2020. Climate and plant community diversity in  
517 space and time. *Proceedings of the National Academy of Sciences* **117**: 4464-  
518 4470.
- 519 Hartley IP, Heinemeyer A, Evans SP & Ineson P. 2007. The effect of soil warming on  
520 bulk soil vs. rhizosphere respiration. *Global Change Biology* **13**: 2654-2667.
- 521 Heinen R, Hannula SE, De Long JR, Huberty M, Jongen R, Kielak A, Steinauer K, Zhu  
522 F & Bezemer TM. 2020. Plant community composition steers grassland  
523 vegetation via soil legacy effects. *Ecology Letters* **23**: 973-982.
- 524 Hermans SM, Buckley HL, Case BS, Curran-Cournane F, Taylor M & Lear G. 2020.  
525 Using soil bacterial communities to predict physico-chemical variables and soil  
526 quality. *Microbiome* **8**: 79.
- 527 Hintze C, Heydel F, Hoppe C, Cunze S, König A & Tackenberg O. 2013. D3: The  
528 Dispersal and Diaspore Database – Baseline data and statistics on seed dispersal.  
529 *Perspectives in Plant Ecology, Evolution and Systematics* **15**: 180-192.
- 530 Horn S, Hempel S, Verbruggen E, Rillig MC & Caruso T. 2017. Linking the community  
531 structure of arbuscular mycorrhizal fungi and plants: a story of interdependence?  
532 *The ISME Journal* **11**: 1400-1411.
- 533 Junker RR, Hanusch M, He X, Ruiz-Hernández V, Otto J-C, Kraushaar S, Bauch K,  
534 Griessenberger F, Ohler L-M & Trutschnig W. 2020. Ödenwinkel: an Alpine  
535 platform for observational and experimental research on the emergence of  
536 multidiversity and ecosystem complexity. *Web Ecology* **20**: 95-106.
- 537 Kahmen S & Poschlod P. 2004. Plant functional trait responses to grassland succession  
538 over 25 years. *Journal of Vegetation Science* **15**: 21-32.
- 539 Kembel SW, Cowan PD, Helmus MR, Cornwell WK, Morlon H, Ackerly DD,  
540 Blomberg SP & Webb CO. 2010. Picante: R tools for integrating phylogenies  
541 and ecology. *Bioinformatics* **26**: 1463-1464.
- 542 Knelman JE, Legg TM, O'Neill SP, Washenberger CL, González A, Cleveland CC &  
543 Nemergut DR. 2012. Bacterial community structure and function change in  
544 association with colonizer plants during early primary succession in a glacier

- 545           forefield. *Soil Biology and Biochemistry* **46**: 172-180.
- 546 Kruger C, Kohout P, Janouskova M, Puschel D, Frouz J & Rydlova J. 2017. Plant  
547           Communities Rather than Soil Properties Structure Arbuscular Mycorrhizal  
548           Fungal Communities along Primary Succession on a Mine Spoil. *Frontiers in*  
549           *Microbiology* **8**: 719.
- 550 Laliberte E & Legendre P. 2010. A distance-based framework for measuring functional  
551           diversity from multiple traits. *Ecology* **91**: 299-305.
- 552 Lange M, Eisenhauer N, Sierra CA, Bessler H, Engels C, Griffiths RI, Mellado-  
553           Vazquez PG, Malik AA, Roy J, Scheu S et al. 2015. Plant diversity increases  
554           soil microbial activity and soil carbon storage. *Nature Communications* **6**: 6707.
- 555 Leff JW, Bardgett RD, Wilkinson A, Jackson BG, Pritchard WJ, De Long JR, Oakley  
556           S, Mason KE, Ostle NJ, Johnson D et al. 2018. Predicting the structure of soil  
557           communities from plant community taxonomy, phylogeny, and traits. *The ISME*  
558           *Journal* **12**: 1794-1805.
- 559 Lopez-Angulo J, de la Cruz M, Chacon-Labela J, Illuminati A, Matesanz S, Pescador  
560           DS, Pias B, Sanchez AM & Escudero A. 2020. The role of root community  
561           attributes in predicting soil fungal and bacterial community patterns. *New*  
562           *Phytologist* **228**: 1070-1082.
- 563 Losapio G, Cerabolini BEL, Maffioletti C, Tampucci D, Gobbi M & Caccianiga M.  
564           2021. The Consequences of Glacier Retreat Are Uneven Between Plant Species.  
565           *Frontiers in Ecology and Evolution* **8**:
- 566 Miller TK, Heegaard E, Hassel K, Kapfer J & Bartha S. 2020. Environmental variables  
567           driving species composition in subarctic springs in the face of climate change.  
568           *Journal of Vegetation Science* **32**: e12955.
- 569 Miransari M. 2011. Interactions between arbuscular mycorrhizal fungi and soil bacteria.  
570           *Applied Microbiology and Biotechnology* **89**: 917-930.
- 571 Mitchell RJ, Hester AJ, Campbell CD, Chapman SJ, Cameron CM, Hewison RL &  
572           Potts JM. 2011. Explaining the variation in the soil microbial community: do  
573           vegetation composition and soil chemistry explain the same or different parts of

- 574 the microbial variation? *Plant and Soil* **351**: 355-362.
- 575 Mony C, Gaudu V, Ricono C, Jambon O & Vandenkoornhuyse P. 2021. Plant  
576 neighbours shape fungal assemblages associated with plant roots: A new  
577 understanding of niche-partitioning in plant communities. *Functional Ecology*  
578 **35**: 1768-1782.
- 579 Mouhamadou B, Puissant J, Personeni E, Desclos-Theveniau M, Kastl EM, Schloter M,  
580 Zinger L, Roy J, Geremia RA & Lavorel S. 2013. Effects of two grass species  
581 on the composition of soil fungal communities. *Biology and Fertility of Soils*  
582 **49**: 1131-1139.
- 583 Navratilova D, Tlaskalova P, Kohout P, Drevojan P, Fajmon K, Chytrý M & Baldrian P.  
584 2019. Diversity of fungi and bacteria in species-rich grasslands increases with  
585 plant diversity in shoots but not in roots and soil. *FEMS Microbiology Ecology*  
586 **95**:
- 587 Ohler LM, Lechleitner M & Junker RR. 2020. Microclimatic effects on alpine plant  
588 communities and flower-visitor interactions. *Scientific Reports* **10**: 1366.
- 589 Ortiz-Alvarez R, Fierer N, de Los Rios A, Casamayor EO & Barberan A. 2018.  
590 Consistent changes in the taxonomic structure and functional attributes of  
591 bacterial communities during primary succession. *The ISME Journal* **12**: 1658-  
592 1667.
- 593 Pearse WD, Cadotte MW, Cavender-Bares J, Ives AR, Tucker CM, Walker SC &  
594 Helmus MR. 2015. pez: phylogenetics for the environmental sciences.  
595 *Bioinformatics* **31**: 2888-2890.
- 596 Pichler M, Boreux V, Klein AM, Schleuning M, Hartig F & Carvalheiro L. 2019.  
597 Machine learning algorithms to infer trait-matching and predict species  
598 interactions in ecological networks. *Methods in Ecology and Evolution* **11**: 281-  
599 293.
- 600 Porazinska DL, Farrer EC, Spasojevic MJ, Bueno de Mesquita CP, Sartwell SA, Smith  
601 JG, White CT, King AJ, Suding KN & Schmidt SK. 2018. Plant diversity and  
602 density predict belowground diversity and function in an early successional

- 603 alpine ecosystem. *Ecology* **99**: 1942-1952.
- 604 Prober SM, Leff JW, Bates ST, Borer ET, Firn J, Harpole WS, Lind EM, Seabloom EW,  
605 Adler PB, Bakker JD et al. 2015. Plant diversity predicts beta but not alpha  
606 diversity of soil microbes across grasslands worldwide. *Ecology Letters* **18**: 85-  
607 95.
- 608 Rasmussen PU, Bennett AE, Tack AJM & Singh B. 2019. The impact of elevated  
609 temperature and drought on the ecology and evolution of plant–soil microbe  
610 interactions. *Journal of Ecology* **108**: 337-352.
- 611 Raza W, Wang J, Jousset A, Friman VP, Mei X, Wang S, Wei Z & Shen Q. 2020.  
612 Bacterial community richness shifts the balance between volatile organic  
613 compound-mediated microbe-pathogen and microbe-plant interactions.  
614 *Proceedings of the Royal Society B: Biological Sciences* **287**: 20200403.
- 615 Reese AT, Lulow K, David LA & Wright JP. 2018. Plant community and soil conditions  
616 individually affect soil microbial community assembly in experimental  
617 mesocosms. *Ecology and Evolution* **8**: 1196-1205.
- 618 Robroek BJM, Martí M, Svensson BH, Dumont MG, Veraart AJ & Jasey VEJ. 2021.  
619 Rewiring of peatland plant–microbe networks outpaces species turnover. *Oikos*  
620 **130**: 339-353.
- 621 Rudgers JA, Afkhami ME, Bell-Dereske L, Chung YA, Crawford KM, Kivlin SN,  
622 Mann MA & Nuñez MA. 2020. Climate Disruption of Plant-Microbe  
623 Interactions. *Annual Review of Ecology, Evolution, and Systematics* **51**: 561-  
624 586.
- 625 Sanchez-Canizares C, Jorin B, Poole PS & Tkacz A. 2017. Understanding the  
626 holobiont: the interdependence of plants and their microbiome. *Current Opinion*  
627 *in Microbiology* **38**: 188-196.
- 628 Schulz S, Brankatschk R, Dümig A, Kögel-Knabner I, Schloter M & Zeyer J. 2013. The  
629 role of microorganisms at different stages of ecosystem development for soil  
630 formation. *Biogeosciences* **10**: 3983-3996.
- 631 Shen C, Gunina A, Luo Y, Wang J, He JZ, Kuzyakov Y, Hemp A, Classen AT & Ge Y.

- 632           2020. Contrasting patterns and drivers of soil bacterial and fungal diversity  
633           across a mountain gradient. *Environmental Microbiology* **22**: 3287-3301.
- 634   Sweeney CJ, de Vries FT, van Dongen BE & Bardgett RD. 2021. Root traits explain  
635           rhizosphere fungal community composition among temperate grassland plant  
636           species. *New Phytologist* **229**: 1492-1507.
- 637   Teste FP, Kardol P, Turner BL, Wardle DA, Zemunik G, Renton M & Laliberte E. 2017.  
638           Plant-soil feedback and the maintenance of diversity in Mediterranean-climate  
639           shrublands. *Science* **355**: 173-176.
- 640   Tscherko D, Hammesfahr U, Zeltner G, Kandeler E & Böcker R. 2005. Plant succession  
641           and rhizosphere microbial communities in a recently deglaciated alpine terrain.  
642           *Basic and Applied Ecology* **6**: 367-383.
- 643   Vandenkoornhuysen P, Mahe S, Ineson P, Staddon P, Ostle N, Cliquet JB, Francez AJ,  
644           Fitter AH & Young JP. 2007. Active root-inhabiting microbes identified by rapid  
645           incorporation of plant-derived carbon into RNA. *Proceedings of the National*  
646           *Academy of Sciences* **104**: 16970-16975.
- 647   Wargo MJ & Hogan DA. 2006. Fungal--bacterial interactions: a mixed bag of mingling  
648           microbes. *Current Opinion in Microbiology* **9**: 359-364.
- 649   Wojcik R, Eichel J, Bradley JA & Benning LG. 2021. How allogenic factors affect  
650           succession in glacier forefields. *Earth-Science Reviews* **218**:
- 651   Zak DR, Holmes WE, White DC, Peacock AD & Tilman D. 2003. Plant Diversity, Soil  
652           Microbial Communities, and Ecosystem Function: Are There Any Links?  
653           *Ecology* **84**: 2042-2050.
- 654   Zanne AE, Tank DC, Cornwell WK, Eastman JM, Smith SA, FitzJohn RG, McGlenn  
655           DJ, O'Meara BC, Moles AT, Reich PB et al. 2014. Three keys to the radiation  
656           of angiosperms into freezing environments. *Nature* **506**: 89-92.

657 **Figures**

658 **Fig. 1** Random forest predictions using the community table of soil bacterial  
659 communities (OTU table) to predict seven variables of plant (green) and three variables  
660 of fungi (orange) as well as seven variables of environmental factors (blue). The colored  
661 circles at the left of each plot denote the mean  $\pm$  standard deviation of the accuracy of  
662 prediction using the full dataset (results of 10-fold cross validation), and the black  
663 circles denote the mean  $\pm$  standard deviation of the accuracy of prediction for all the  
664 frames. Each grey to black circle on the right of each plot represents the mean accuracy  
665 of prediction of each frame and the color gradient is showing how many correlations of  
666 the 10-fold cross-validation were significant with lighter colors indicating less frequent  
667 significant predictions. A quadratic or linear regression (the model with higher adjusted  
668  $r^2$  value) is fit for the gradient if it is significant, showing a change of the accuracy of  
669 prediction along the successional gradient.

670 **Fig. 2** Random forest predictions using the community table of soil fungal communities  
671 (OUT table) to predict seven variables of plant (green) and three variables of bacteria  
672 (red) as well as seven variables of environmental factors (blue). The colored circles at  
673 the left of each plot denote the mean  $\pm$  standard deviation of the accuracy of prediction  
674 using the full dataset (results of 10-fold cross validation), and the black circles denote  
675 the mean  $\pm$  standard deviation of the accuracy of prediction for all the frames. Each  
676 grey to black circle on the right of each plot represents the mean accuracy of prediction  
677 of each frame and the color gradient is showing how many correlations of the 10-fold  
678 cross-validation were significant with lighter colors indicating less frequent significant  
679 predictions. A quadratic or linear regression (the model with higher adjusted  $r^2$  value)  
680 is fit for the gradient if it is significant, showing a change of the accuracy of prediction  
681 along the successional gradient.

682 **Fig. 3** Random forest predictions using the community table of plant communities to  
683 predict three variables of bacteria (red) and three variables of fungi (orange) as well as  
684 seven variables of environmental factors (blue). The colored circles at the left of each  
685 plot denote the mean  $\pm$  standard deviation of the accuracy of prediction using the full



686 dataset (results of 10-fold cross validation), and the black circles denote the mean  $\pm$   
687 standard deviation of the accuracy of prediction for all the frames. Each grey to black  
688 circle on the right of each plot represents the mean accuracy of prediction of each frame  
689 and the color gradient is showing how many correlations of the 10-fold cross-validation  
690 were significant with lighter colors indicating less frequent significant predictions. A  
691 quadratic or linear regression (the model with higher adjusted  $r^2$  value) is fit for the  
692 gradient if it is significant, showing a change of the accuracy of prediction along the  
693 successional gradient.

694 **Fig. 4** Random forest predictions using all the environmental factors to predict seven  
695 variables of plant (green) and three variables of bacteria (red) as well as three variables  
696 of fungi (orange). The colored circles at the left of each plot denote the mean  $\pm$  standard  
697 deviation of the accuracy of prediction using the full dataset (results of 10-fold cross  
698 validation), and the black circles denote the mean  $\pm$  standard deviation of the accuracy  
699 of prediction for all the frames. Each grey to black circle on the right of each plot  
700 represents the mean accuracy of prediction of each frame and the color gradient is  
701 showing how many correlations of the 10-fold cross-validation were significant with  
702 lighter colors indicating less frequent significant predictions. A quadratic or linear  
703 regression (the model with higher adjusted  $r^2$  value) is fit for the gradient if it is  
704 significant, showing a change of the accuracy of prediction along the successional  
705 gradient.

706 **Fig. 5** Summary of the accuracy of prediction using taxonomic groups (bacteria (a),  
707 fungi (b), plant (c)) and environmental factors (d) to predict variables from the other  
708 three groups along the successional gradient. Variables from each group are color-coded  
709 (red: bacteria, orange: fungi, green: plant, blue: environment) and ranked by accuracy  
710 of prediction.

711 **Fig. 6** Summary of the accuracy of prediction for each variable being predicted by every  
712 single group (red: bacteria, orange: fungi, green: plant, blue: environment) as well as  
713 by the other three groups combined (grey). The label on each boxplot is the result of  
714 Tukey Test showing if there is significant difference of accuracy of prediction between

715 any pair of predicting groups.

716 **Fig. 1**

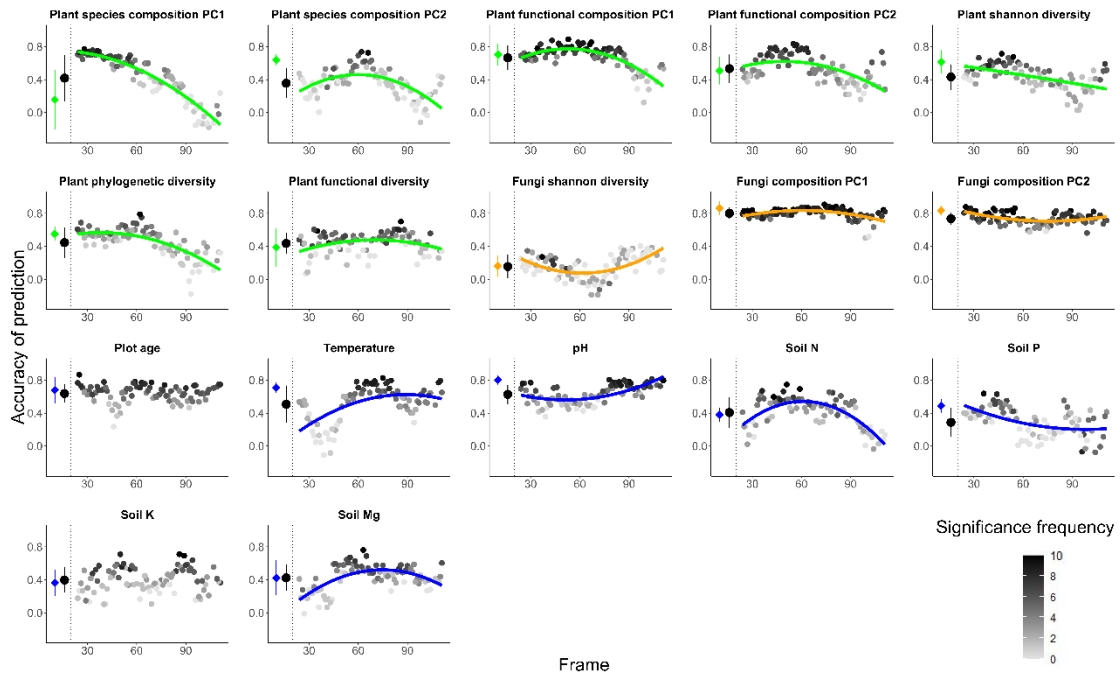

717

718 **Fig. 2**

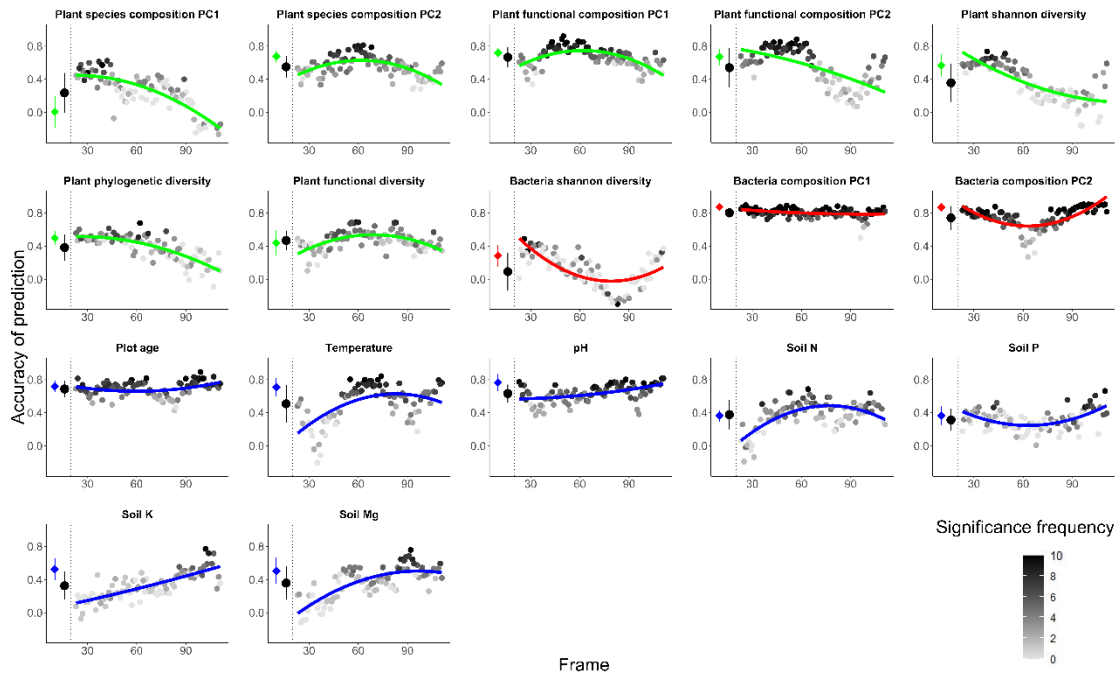

719

Frame

720 **Fig. 3**

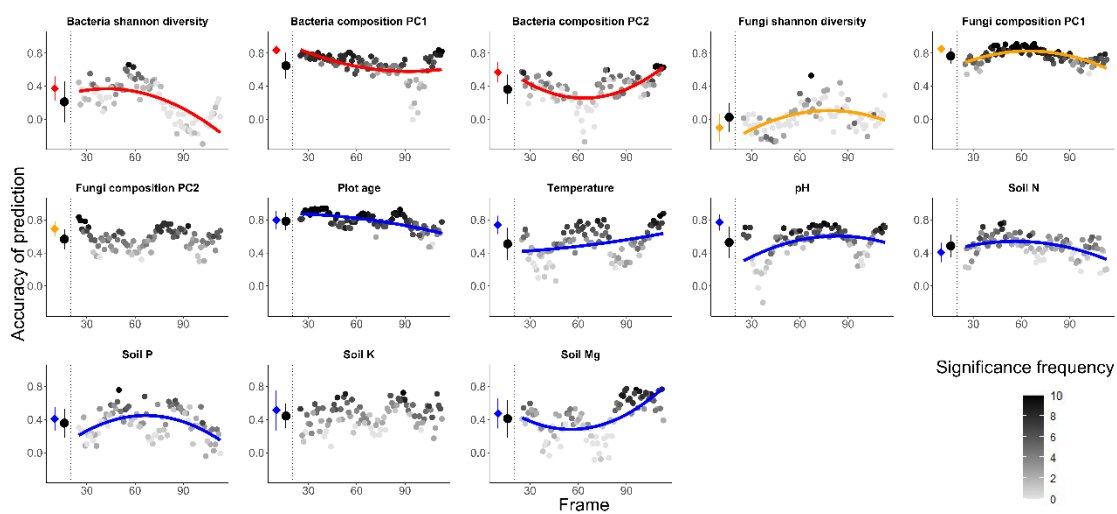

721

722 **Fig. 4**

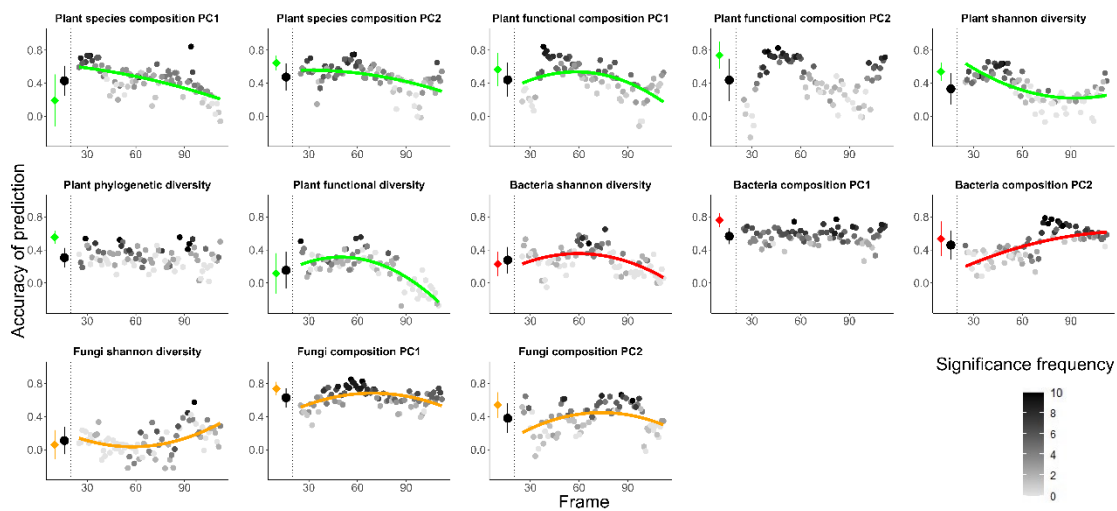

723

724 **Fig. 5**

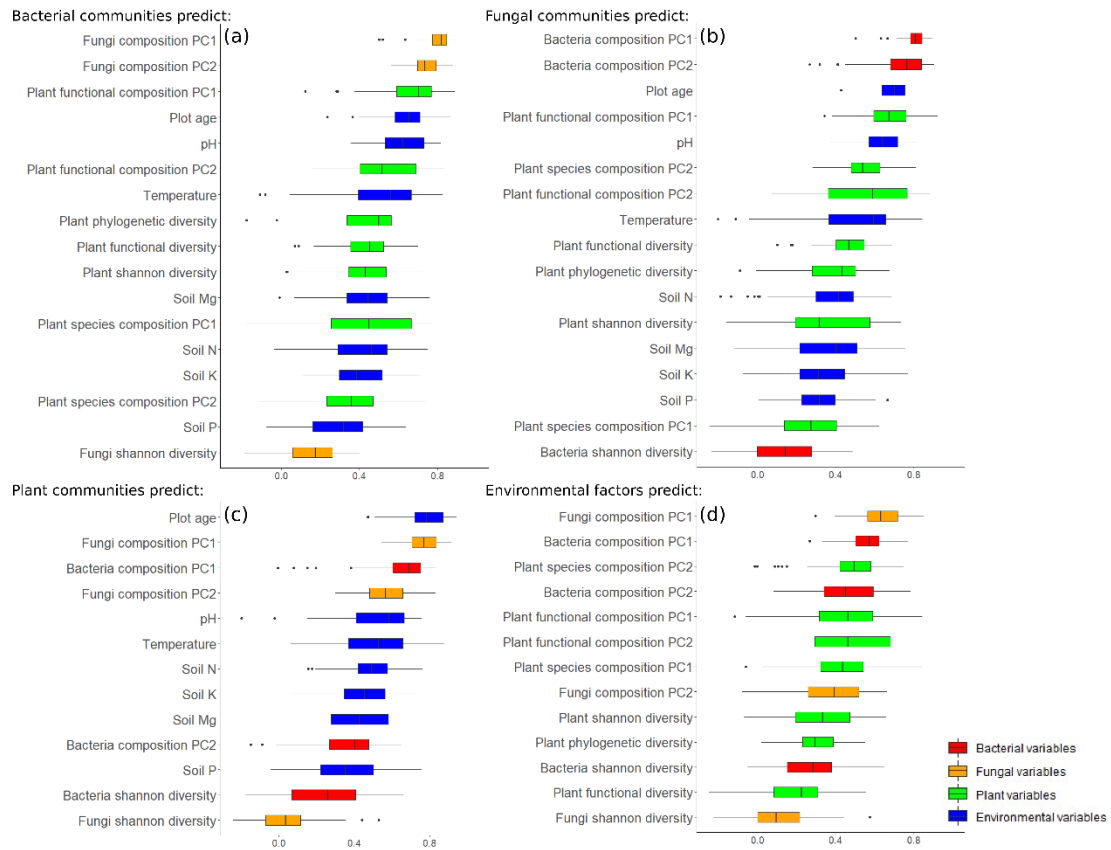

725

726 **Fig. 6**

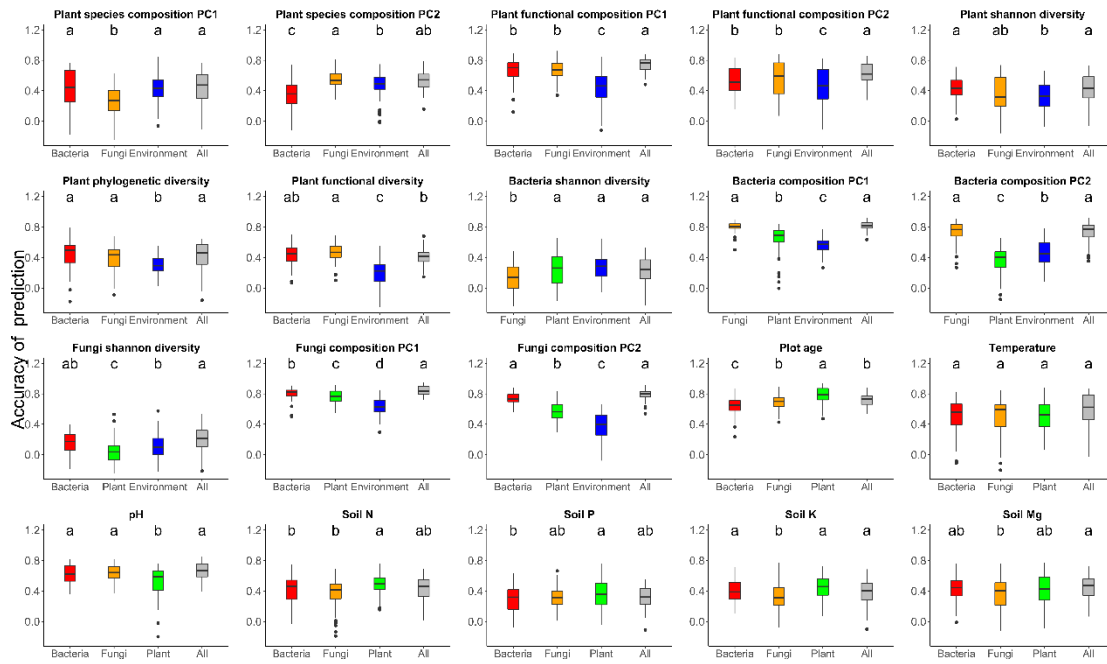

727



728 **Supporting Information**

729 Additional Supporting Information may be found online in the Supporting Information  
730 section at the end of the article.

731 **Table S1** Species composition of plant communities used as explanatory variables in  
732 predictive models.

733 **Table S2** Community table of soil bacterial communities (OTU table) used as  
734 explanatory variables in predictive models.

735 **Table S3** Community table of soil fungal communities (OTU table) used as explanatory  
736 variables in predictive models.

737 **Table S4** Environmental parameters table used as explanatory variables in predictive  
738 models.

739 **Table S5** All the 20 dependent variables used for predictive models.

740 **Table S6** Functional composition of plant communities.

741 **Table S7** Normalized mean value of field-measured traits (plant height, leaf area, leaf  
742 weight, SLA) for 48 species.
